# Supplementary material
Source: PubMed Central journal article supplement (PMC10840668)

Full unedited gel for Figure 1A

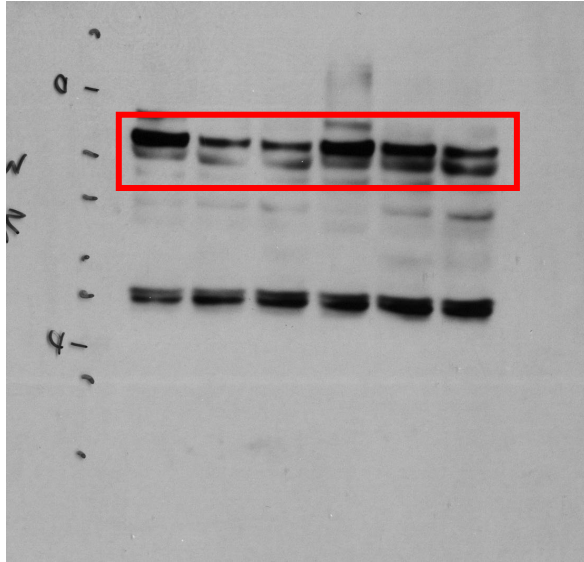

SNRK WB

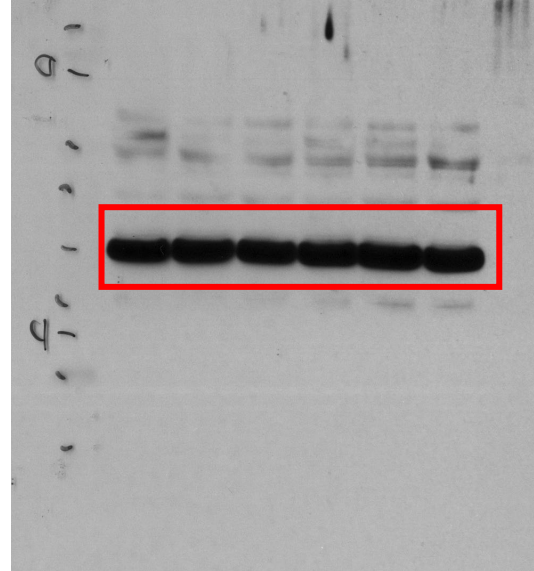

GAPDH WB

Full unedited gel for Figure 2A

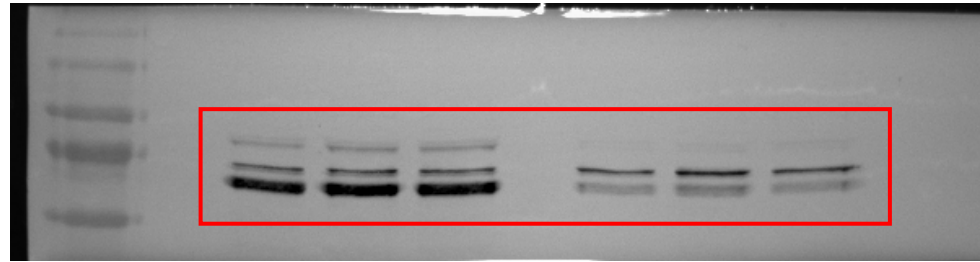

SNRK

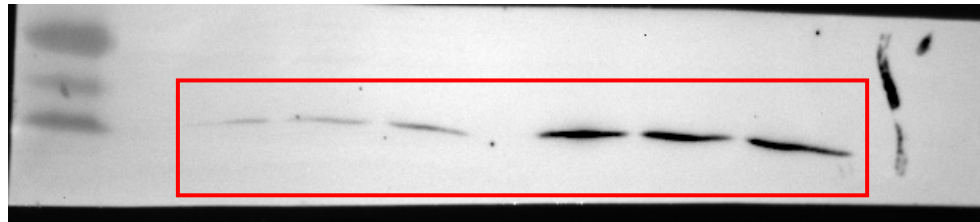

pH2AX

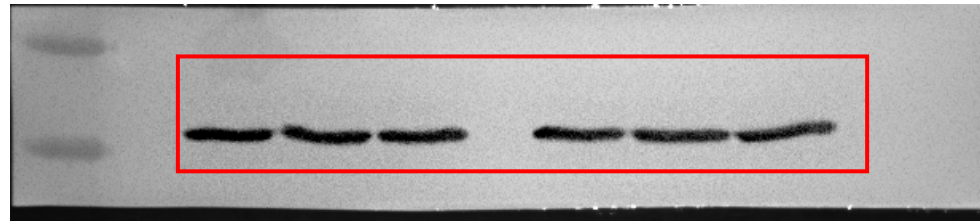

GAPDH

Full unedited gel for Figure 2E

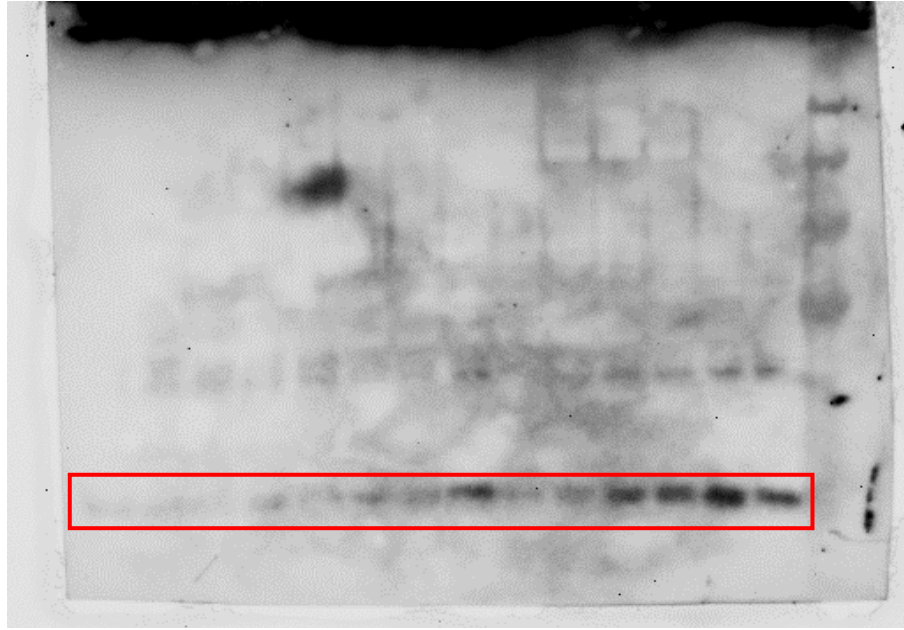

pH2AX  
WB

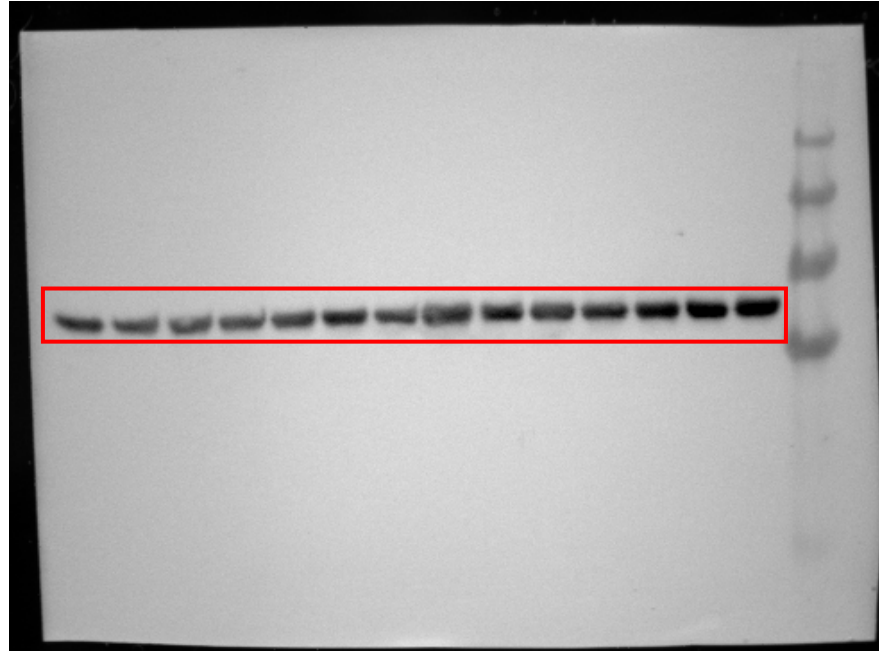

GAPDH  
WB

Full unedited gel for Figure 2G

P-ATR

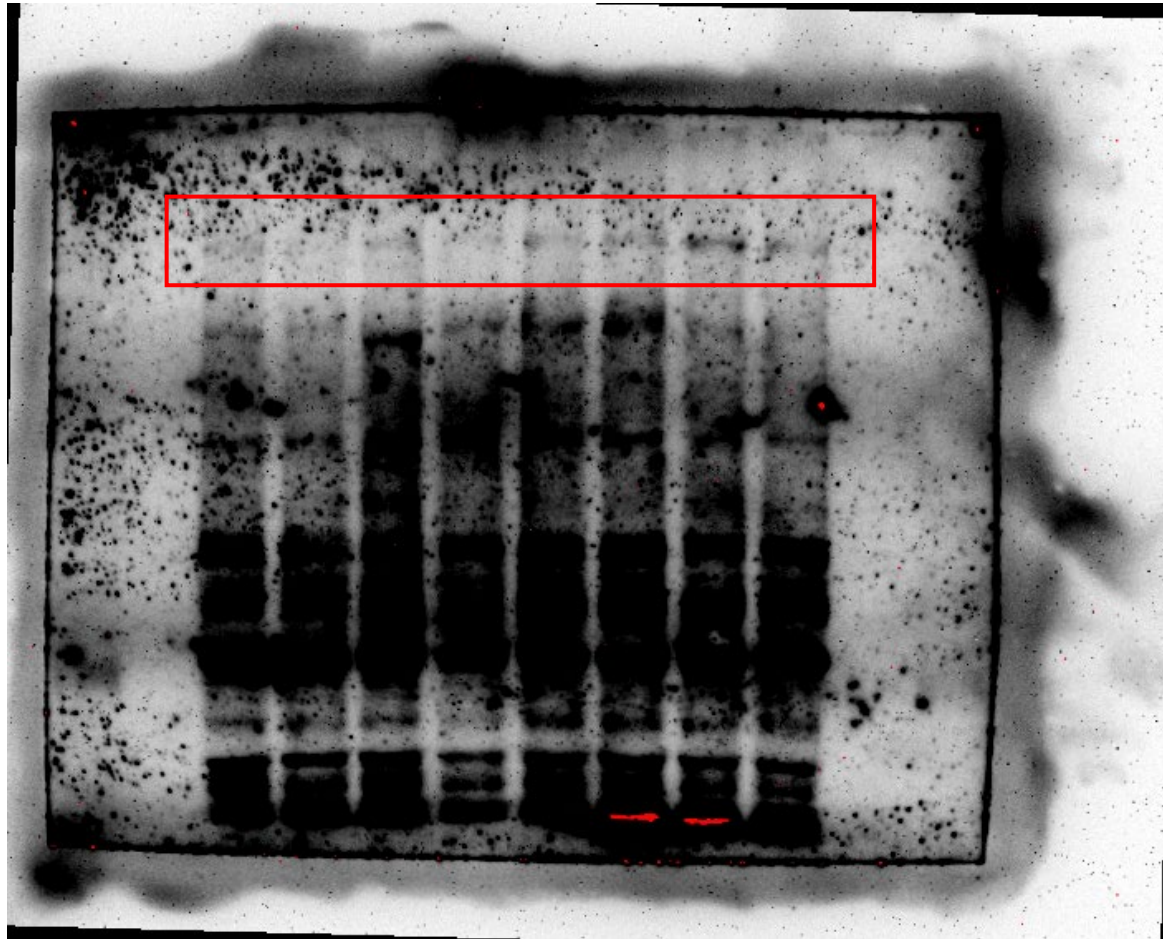

T-ATR

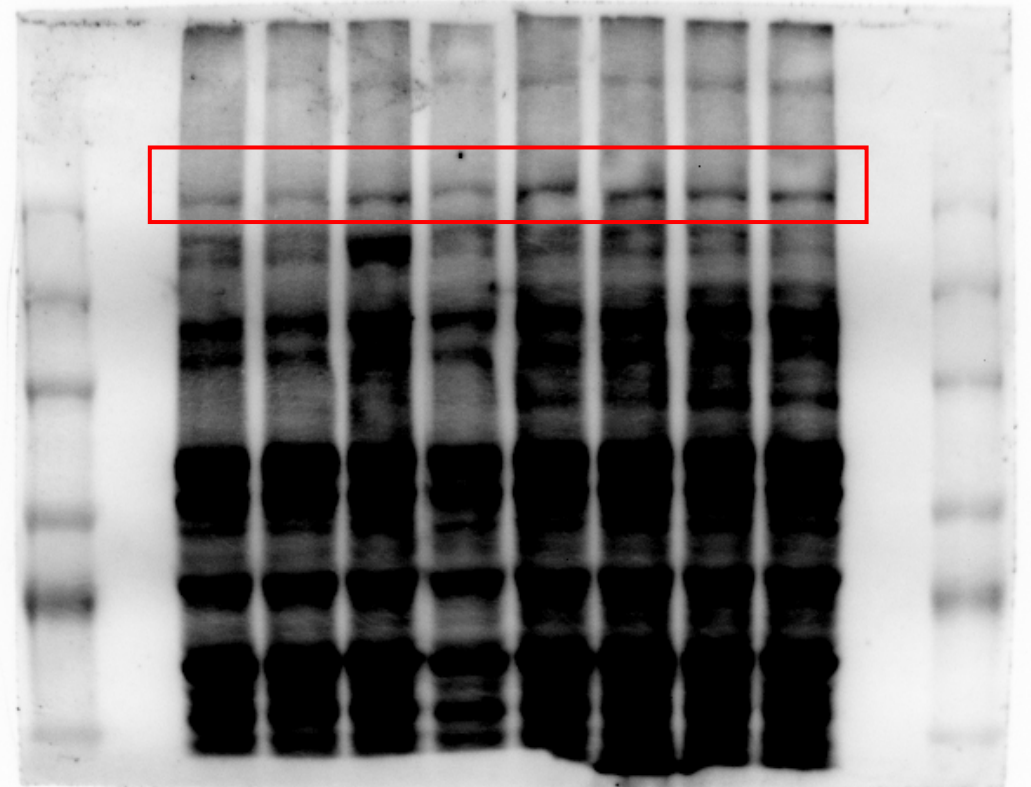

# Full unedited gel for Figure 3D

Input gels

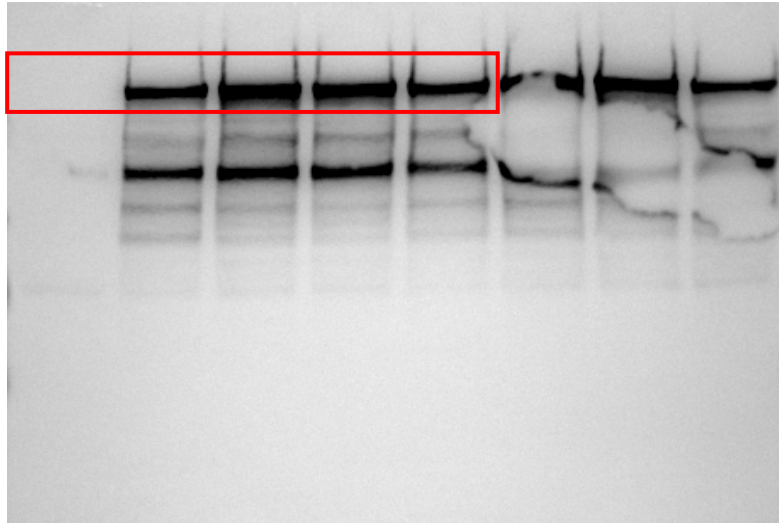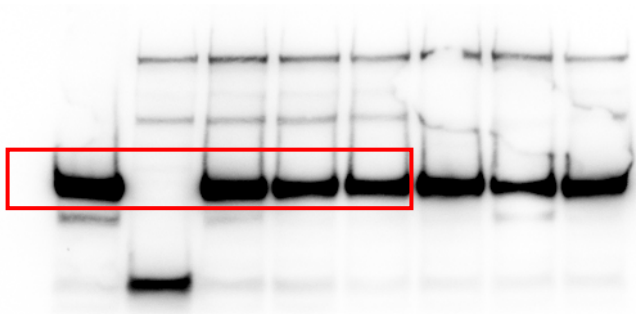

IP gels

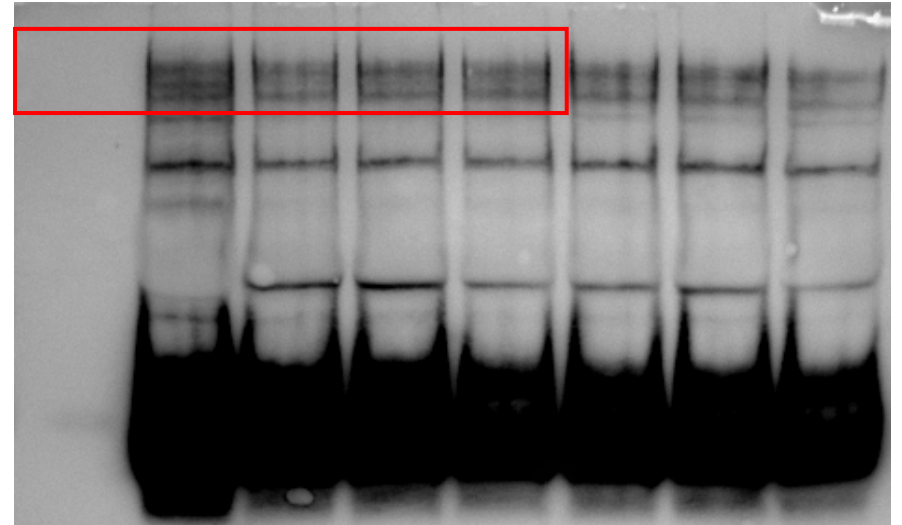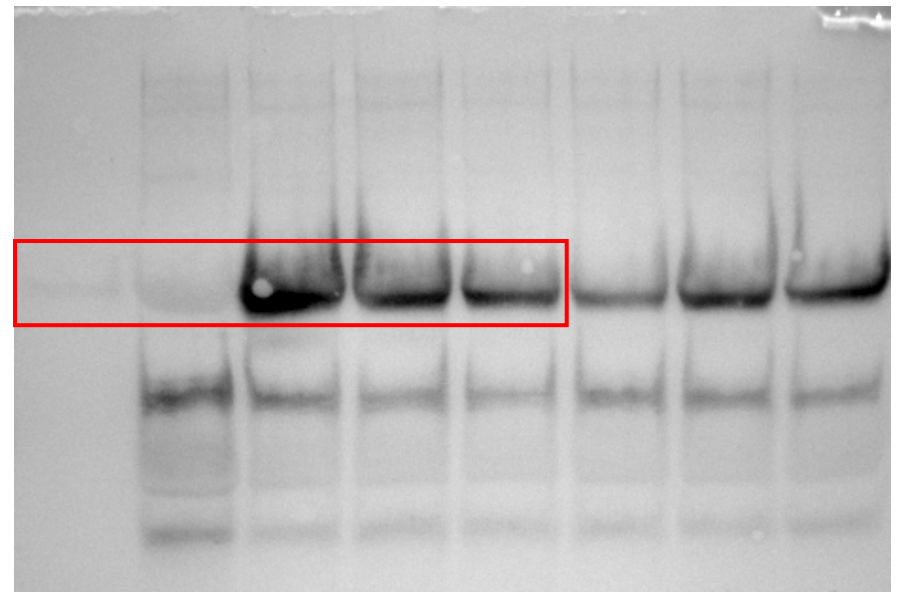

Full unedited gel for Figure 3E

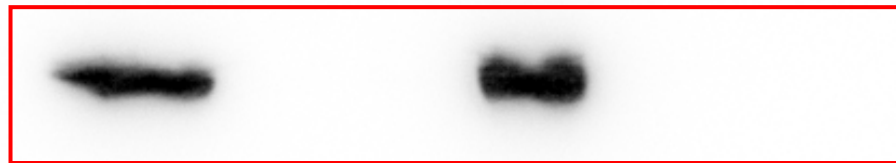

Full unedited gel for Figure 4E

H2AX

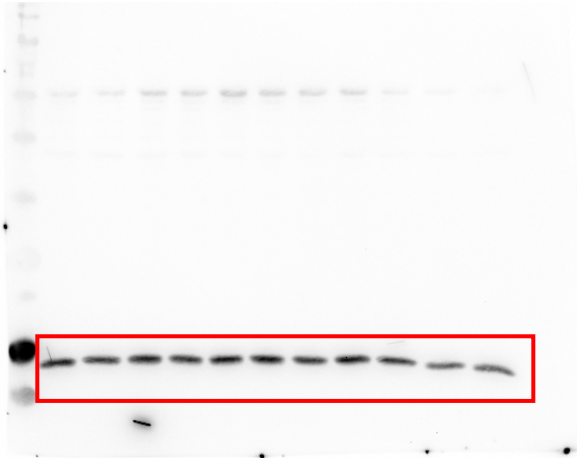

pH2AX

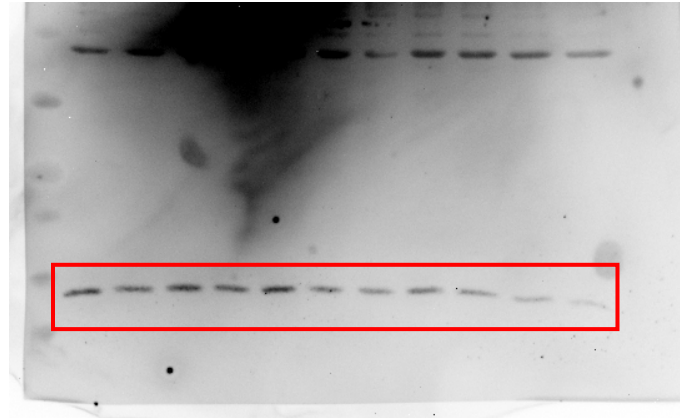

GAPDH

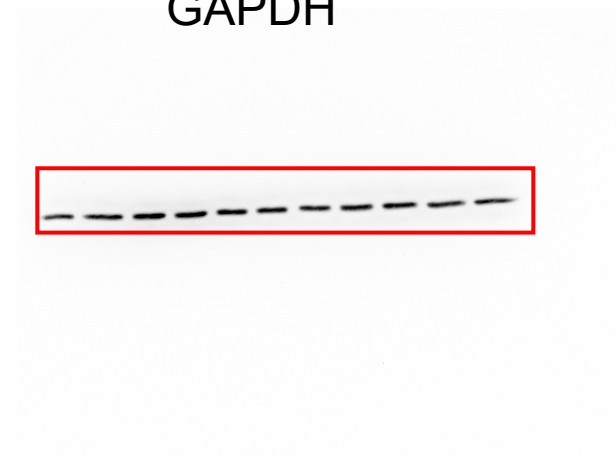

Full unedited gel for Figure 4G

P-ATM

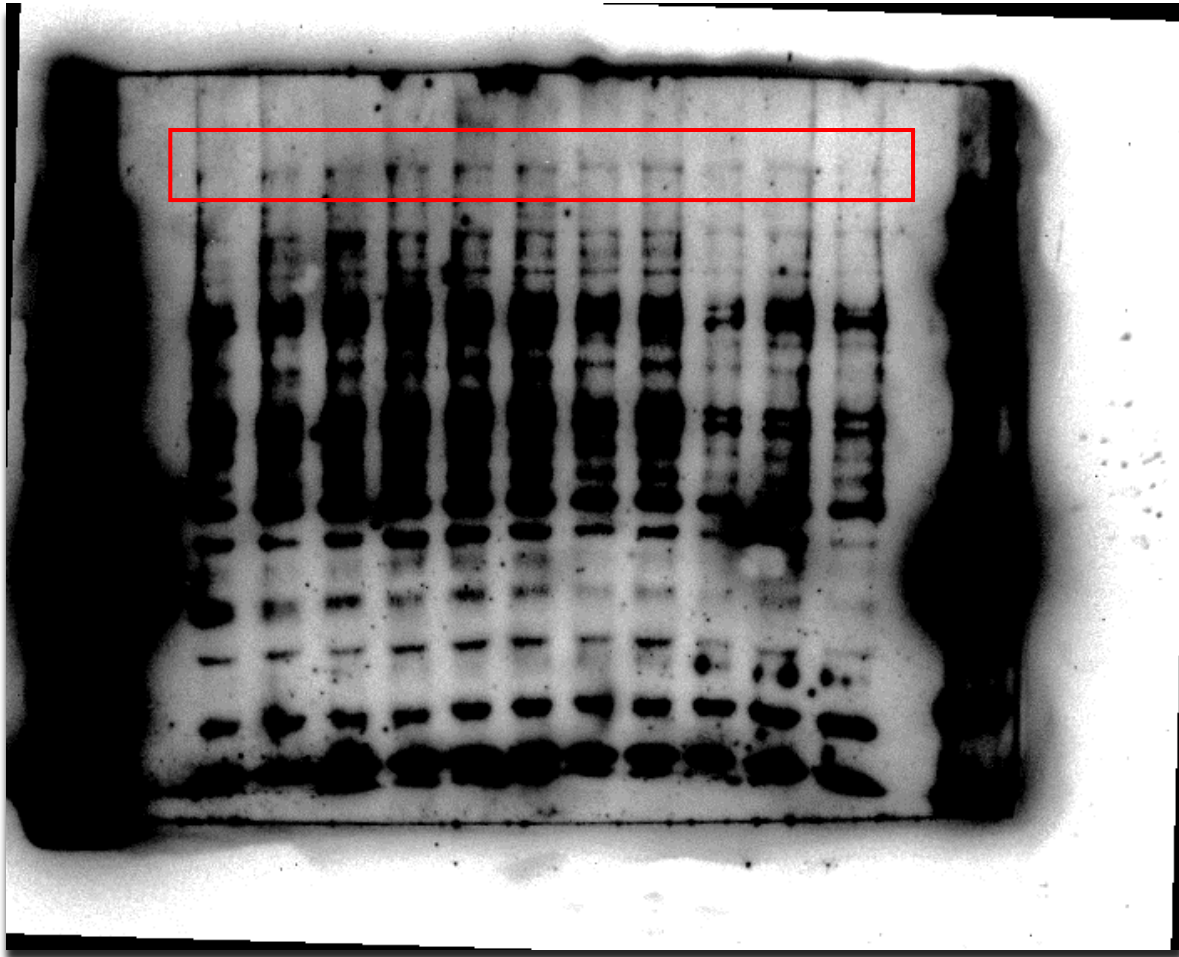

ATM

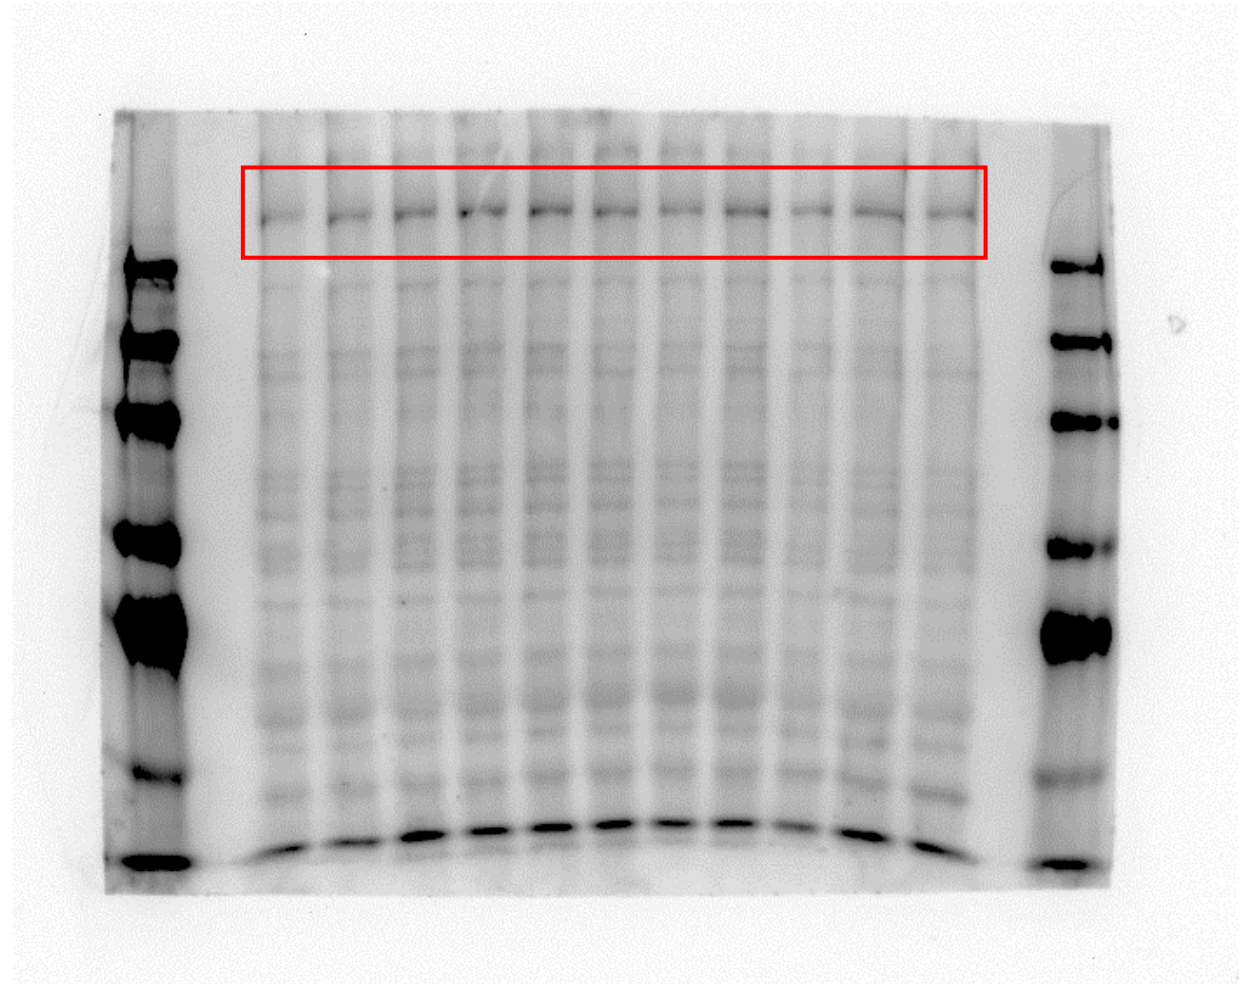



Full unedited gel for Figure 5A

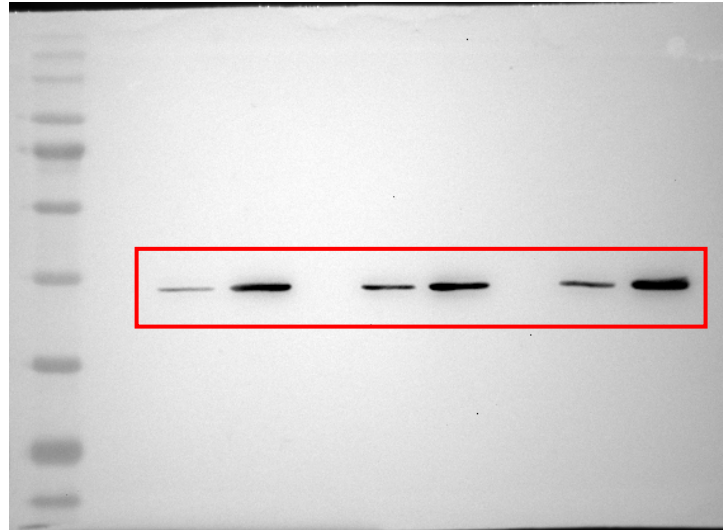

Full unedited gel for Figure 5J

P-ATM

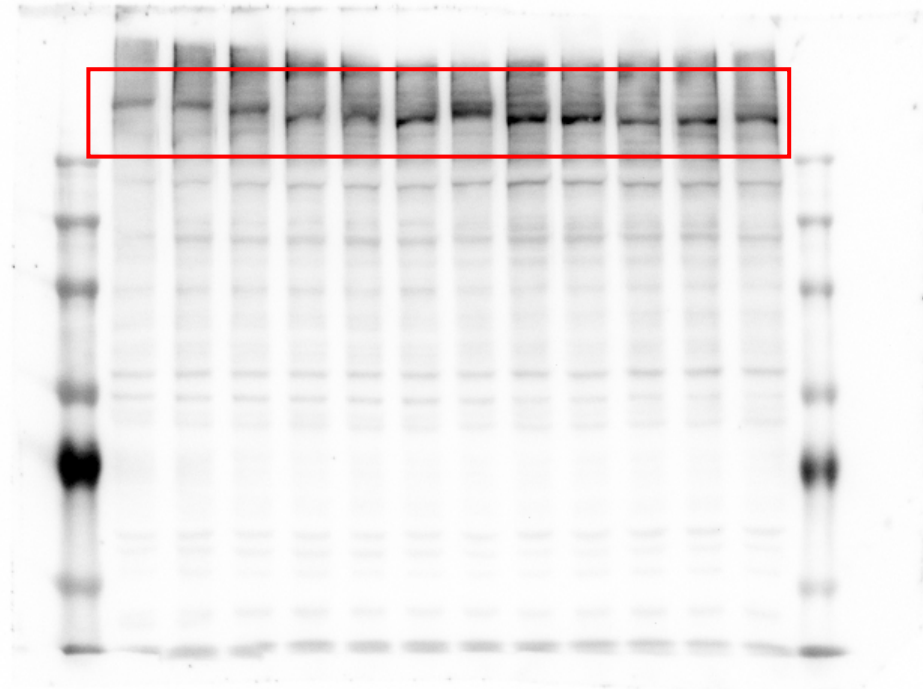

ATM

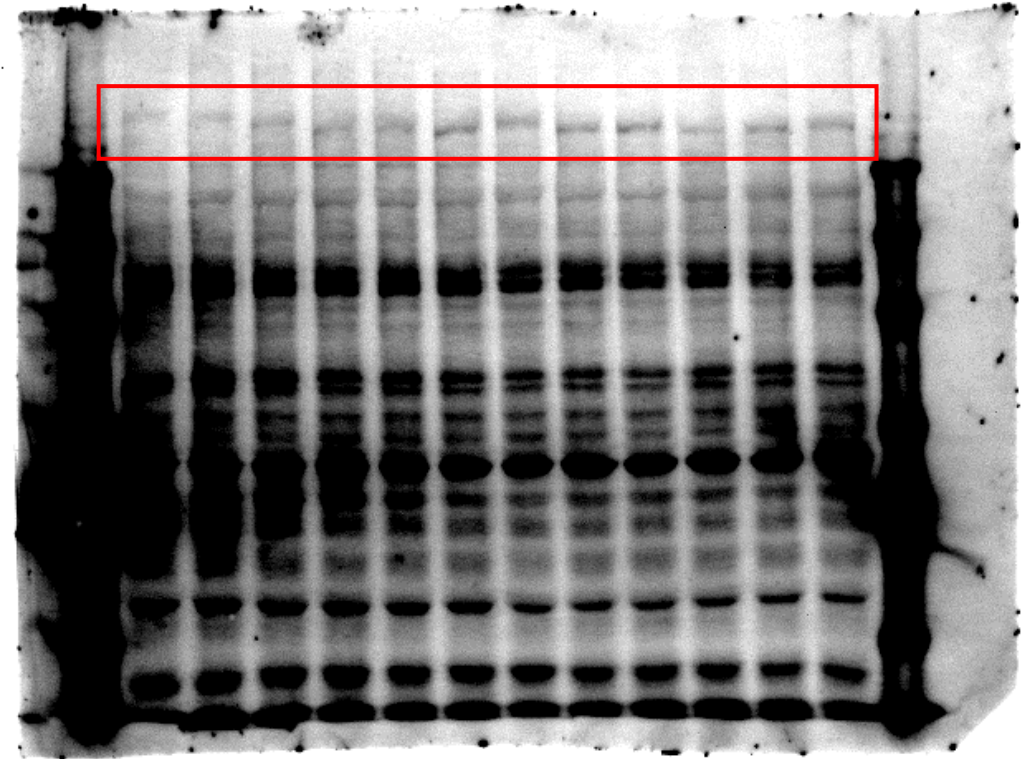

Full unedited gel for Figure S5A

GFP

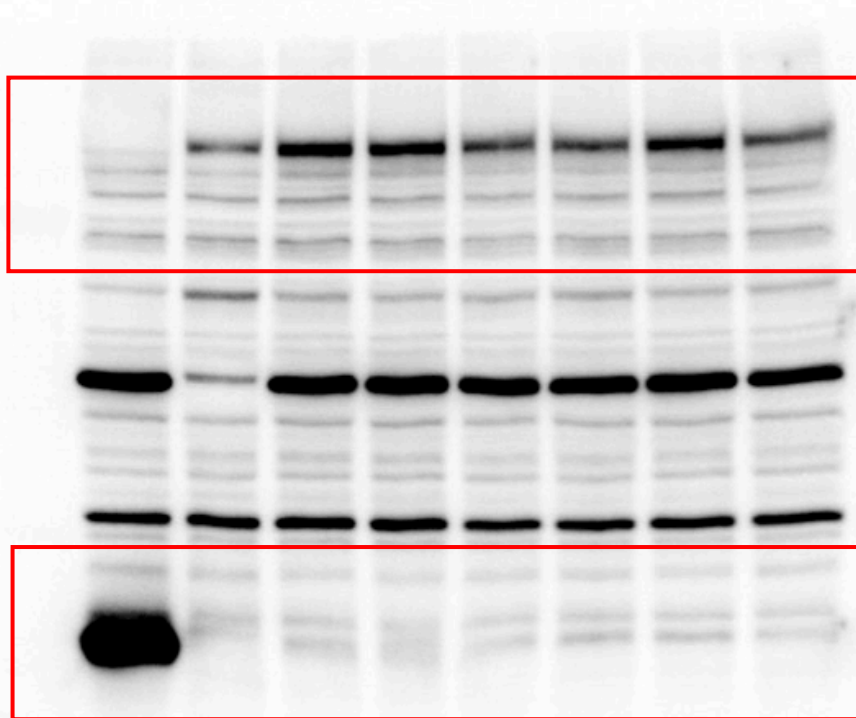

mCherry

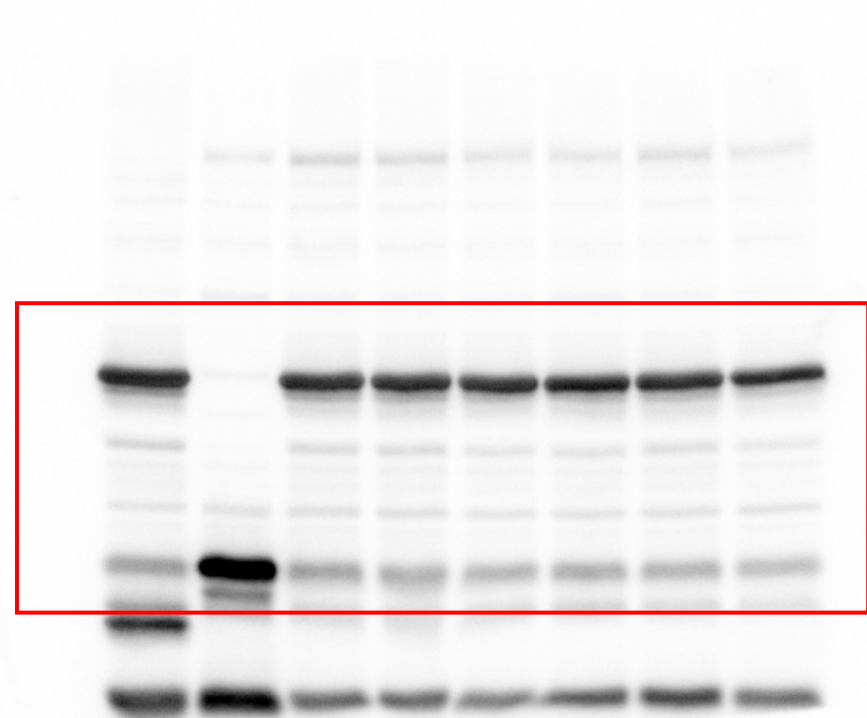

Full unedited gel for Figure S5B

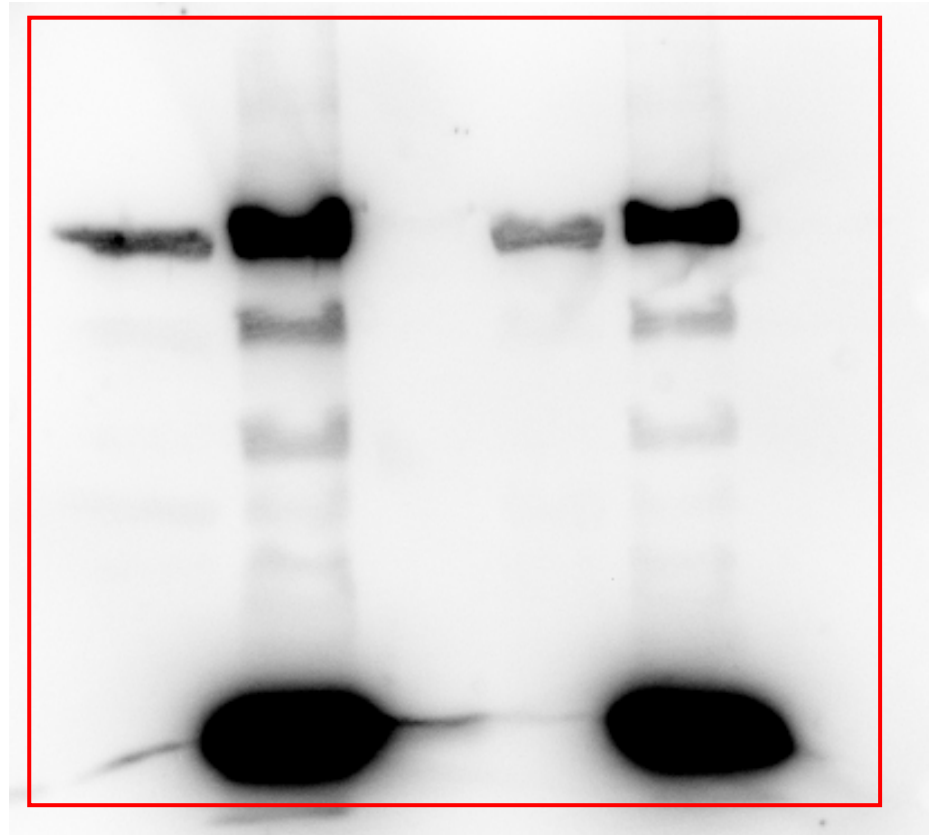

Full unedited gel for Figure S6A

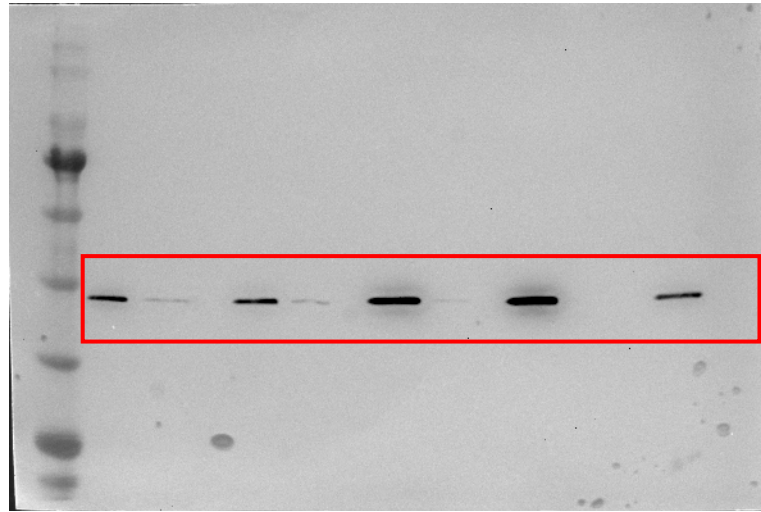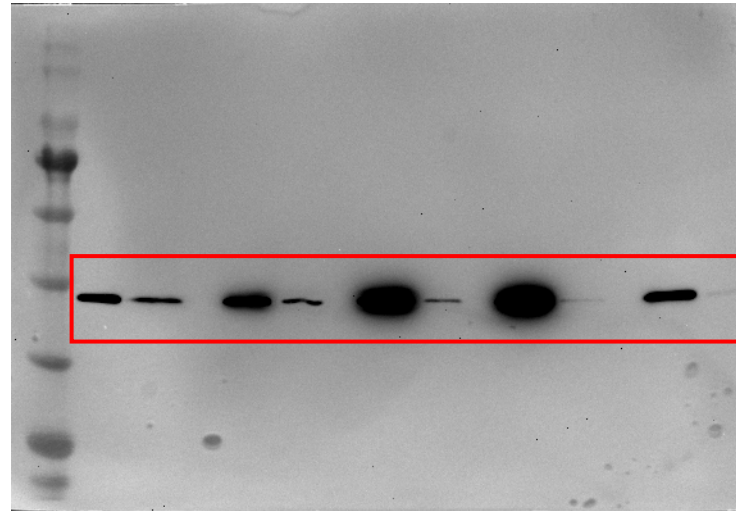

Full unedited gel for Figure S6B

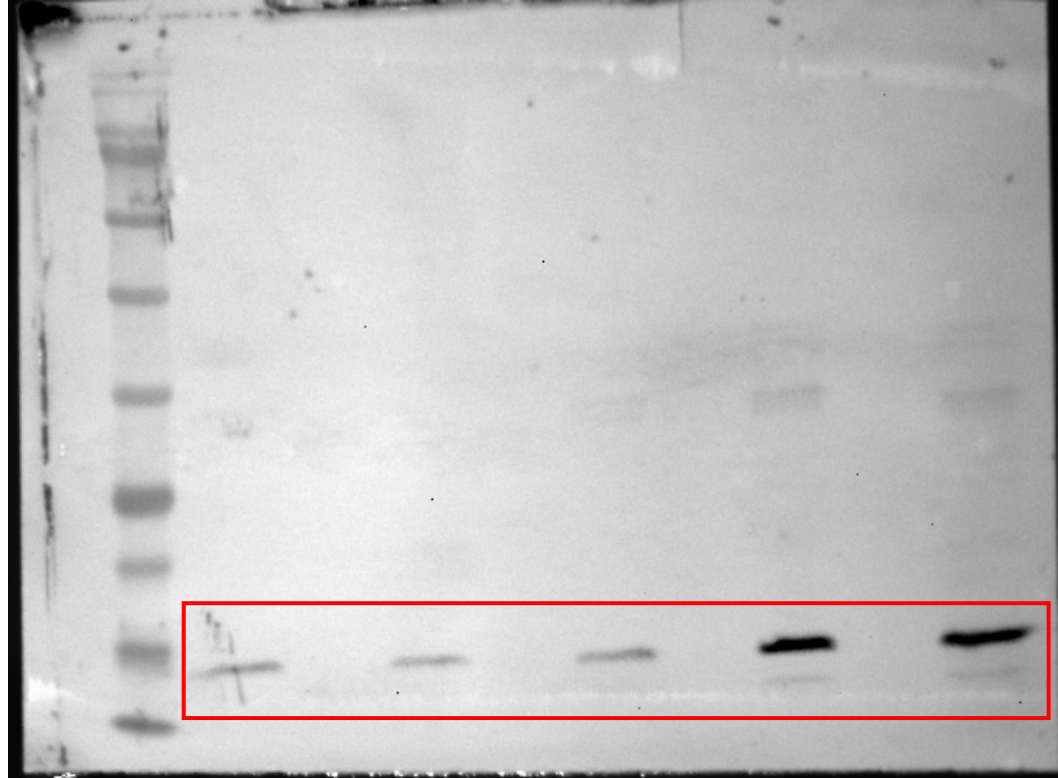

Supplement: NIHMS1929021-supplement-Uncropped_gels.pdf [file NIHMS1929021-supplement-Uncropped_gels.pdf]
