# Supplementary material
Source: PubMed Central journal article supplement (PMC10840668)

Control siRNA

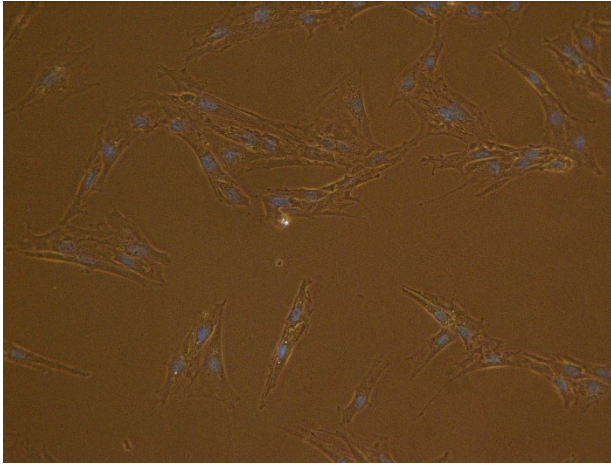

(BF+ Hoechst)

*Snrk* siRNA

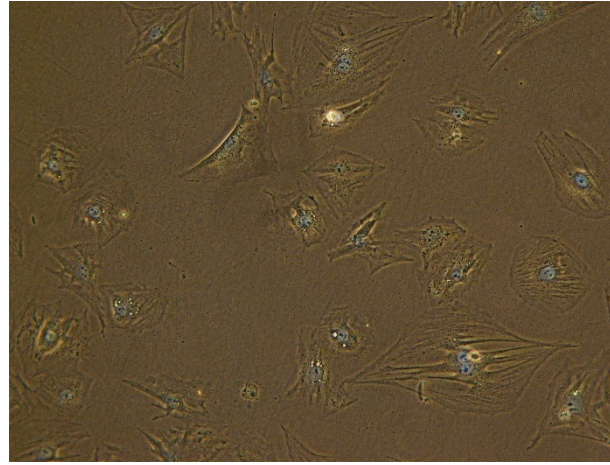

(BF+ Hoechst)

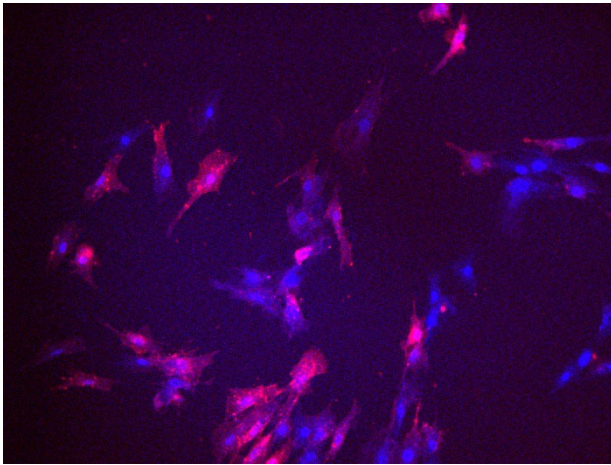

(BF+ Hoechst + Cell Tracker)

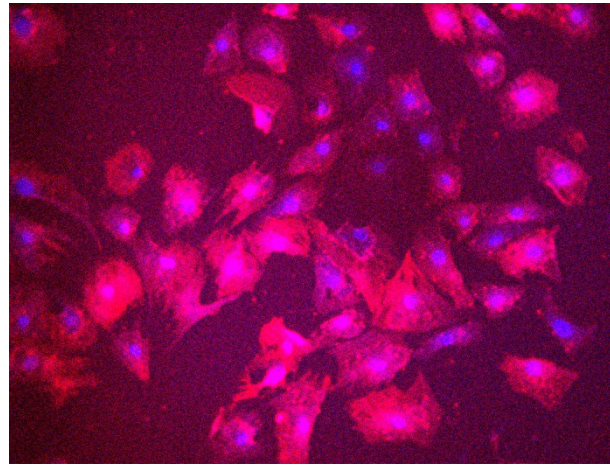

(BF+ Hoechst + Cell Tracker)

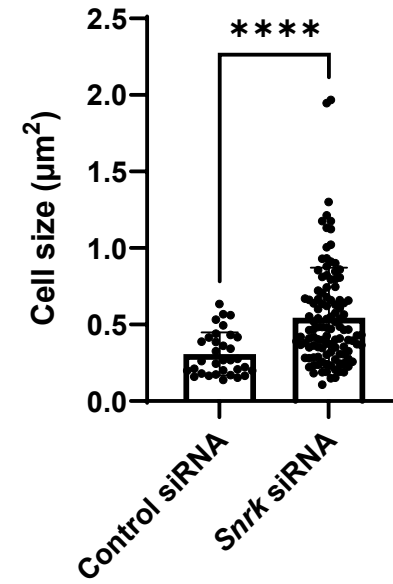

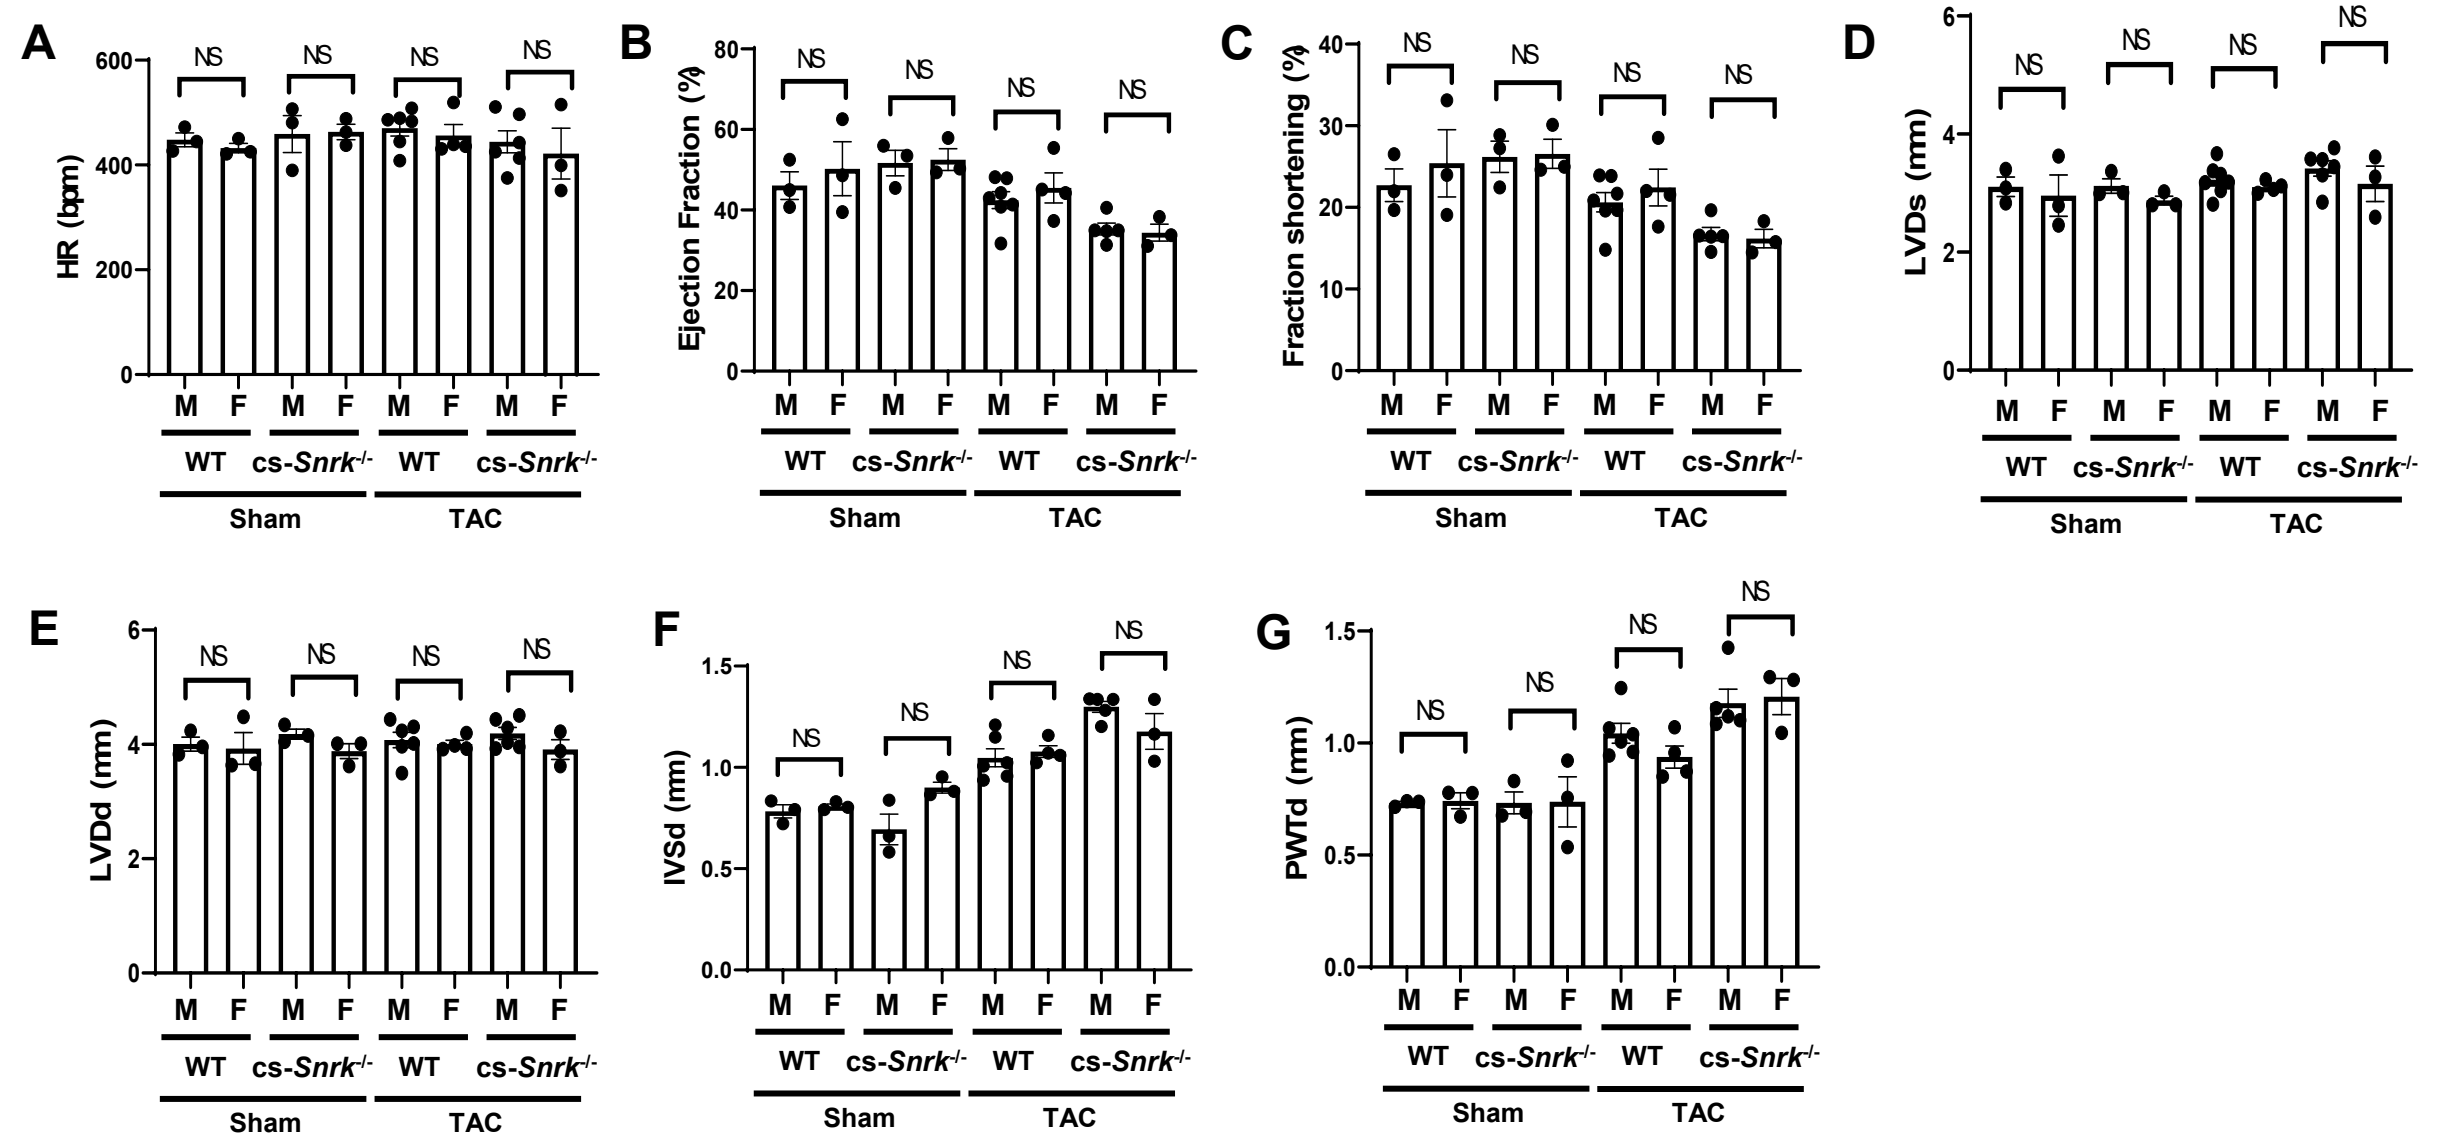

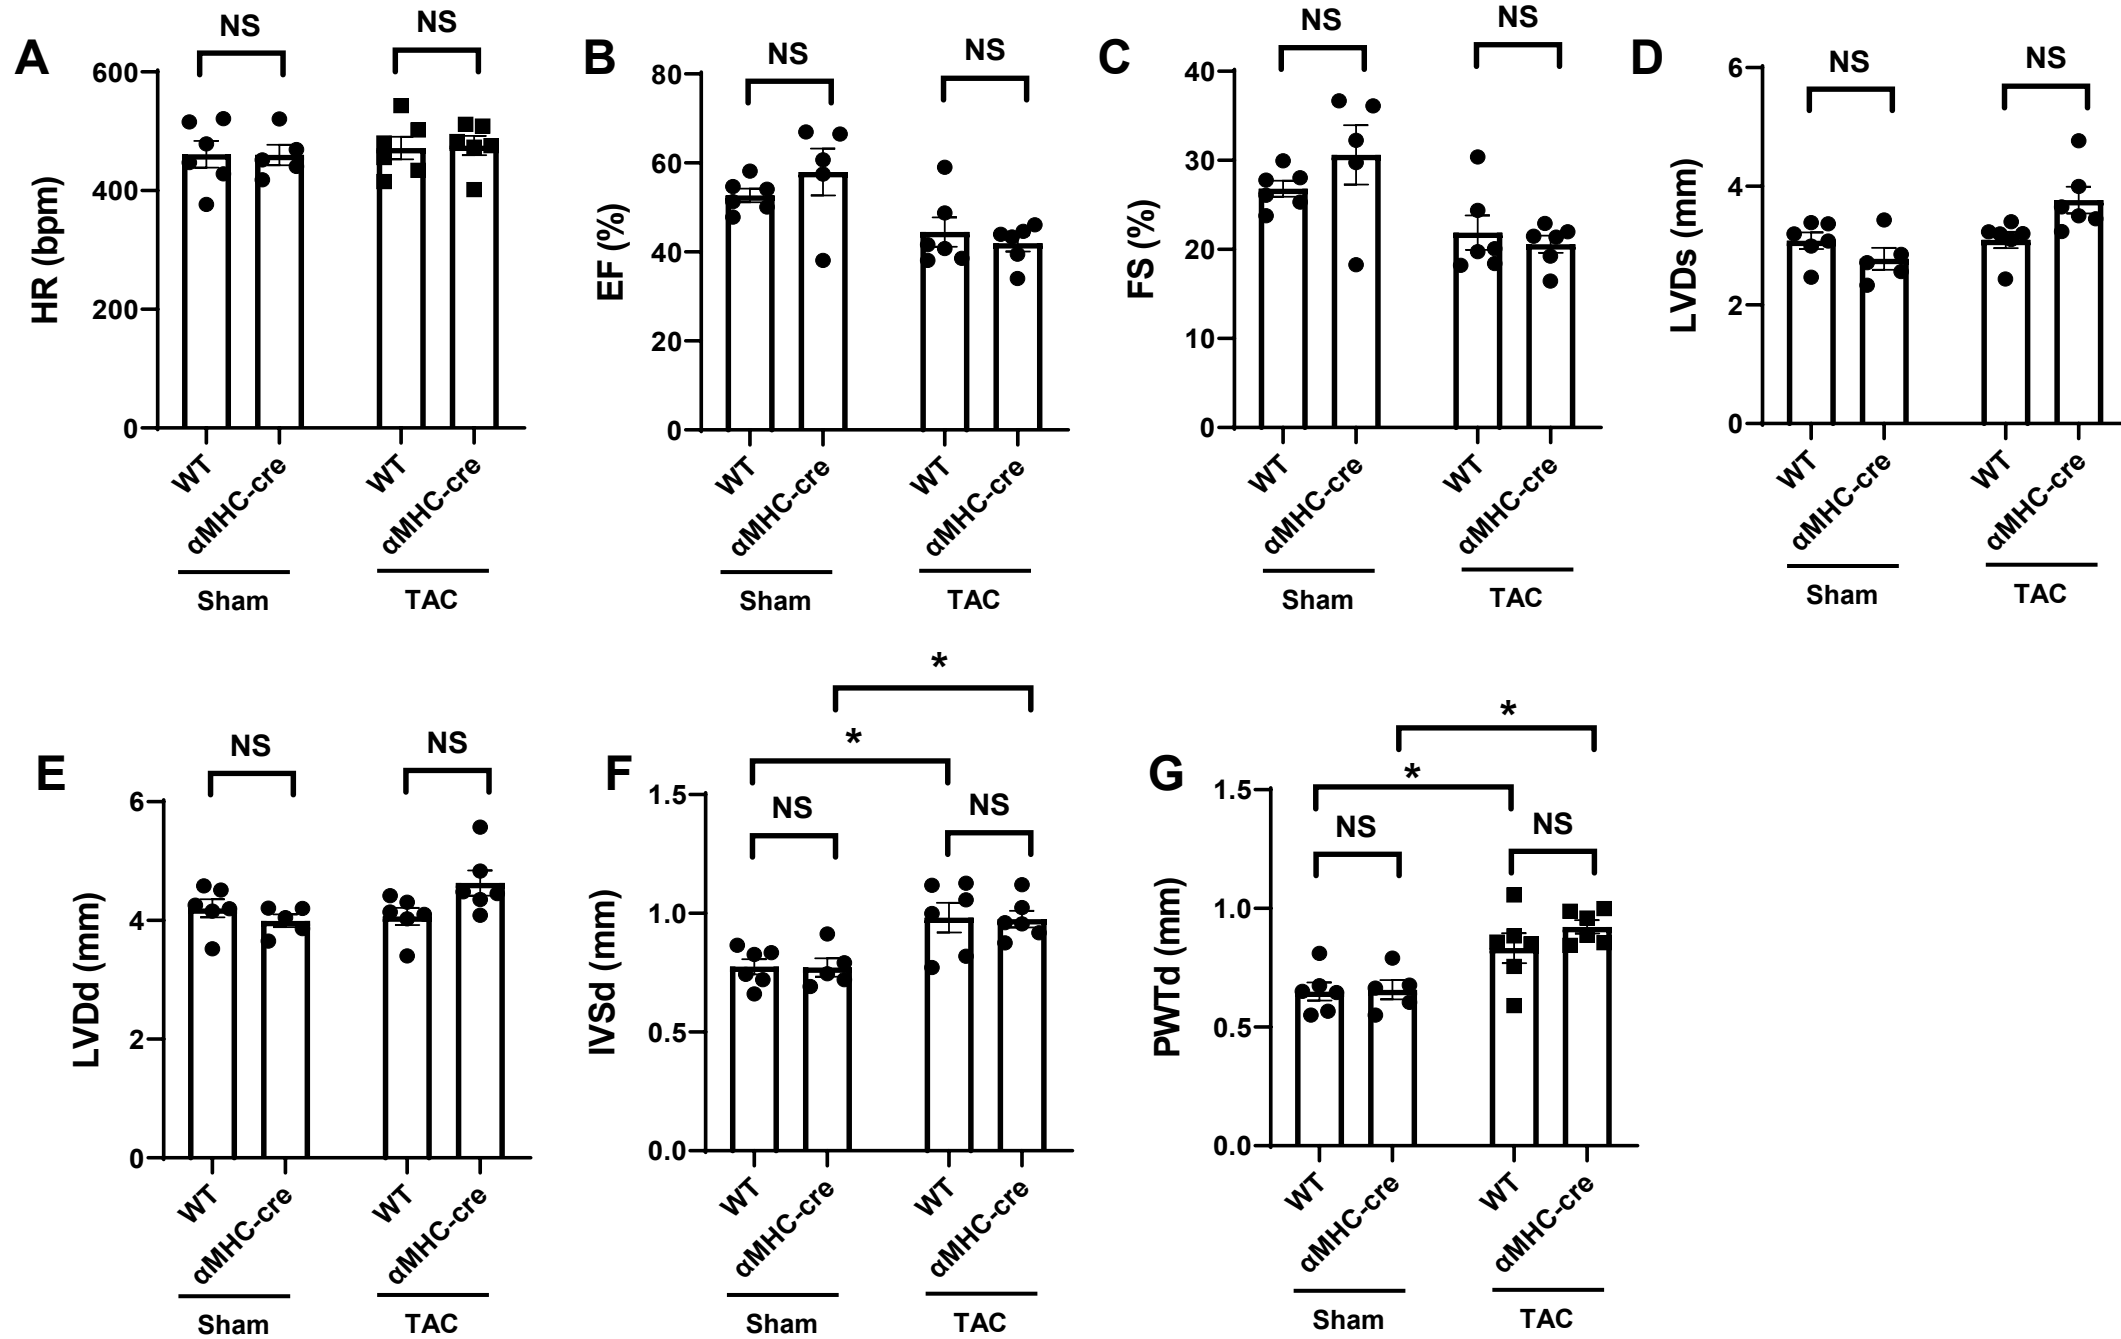

A

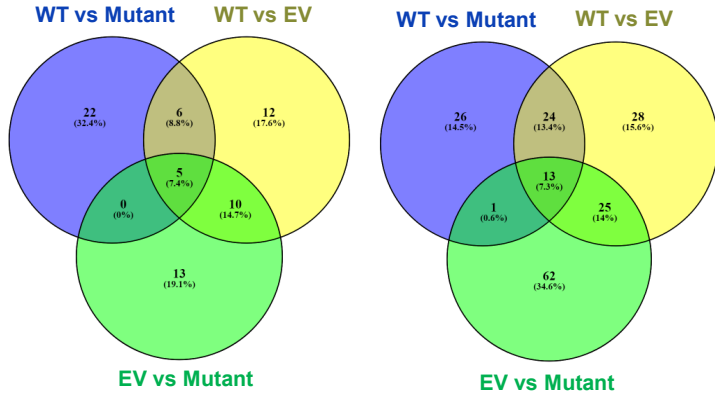

B

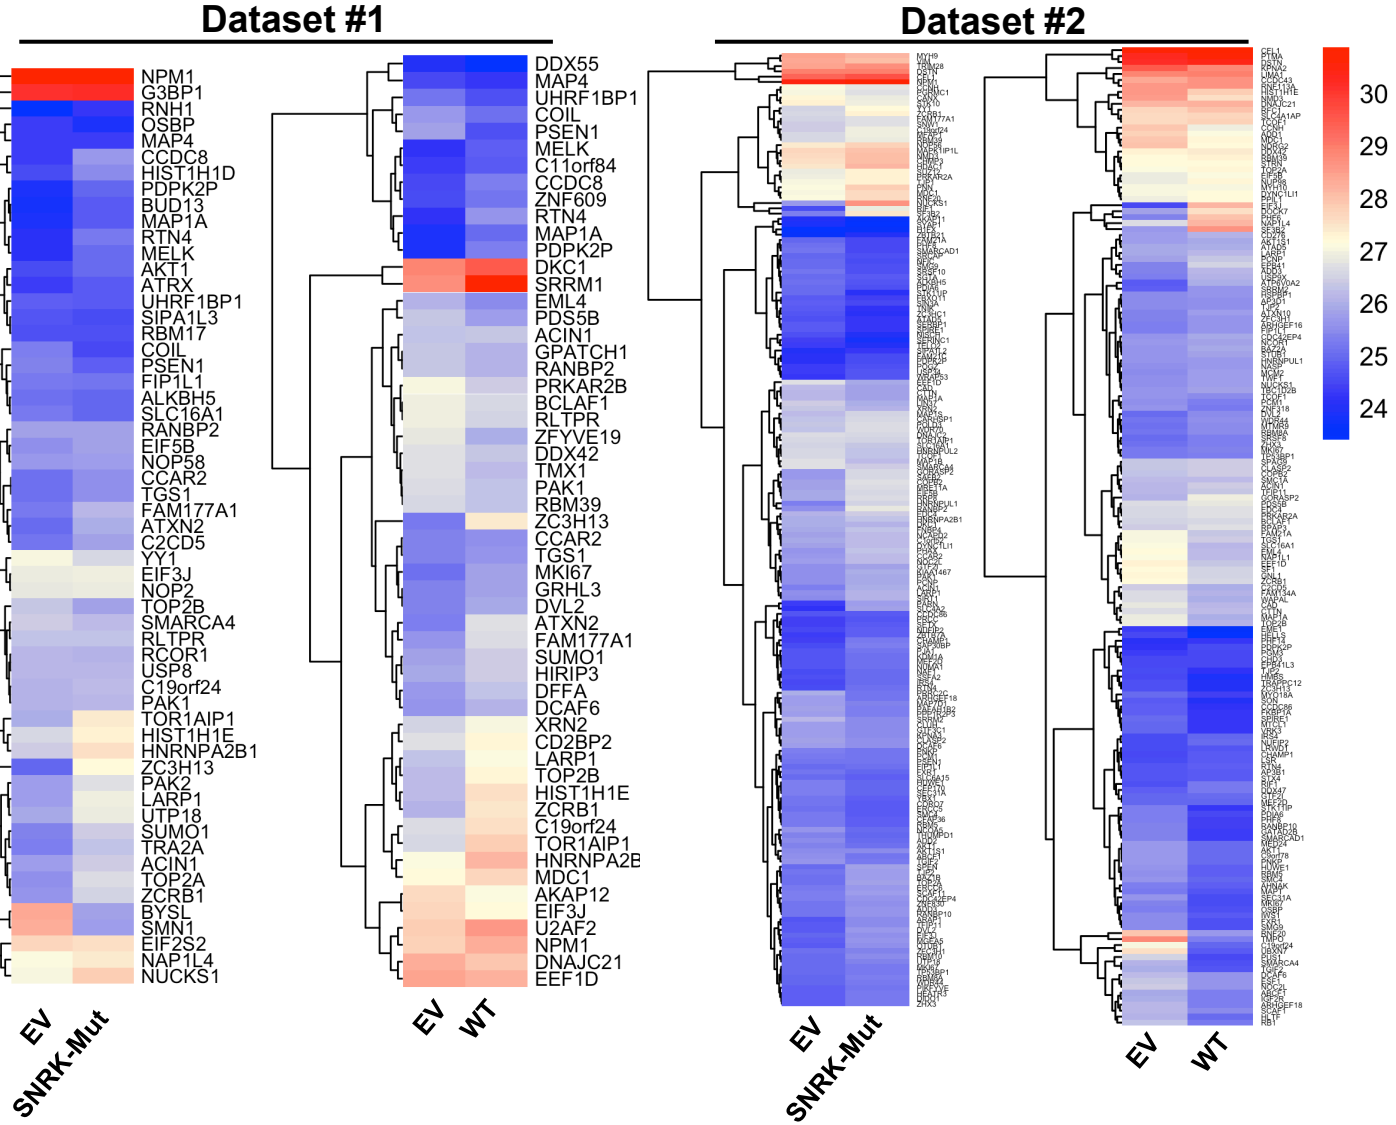

C

STRING analysis

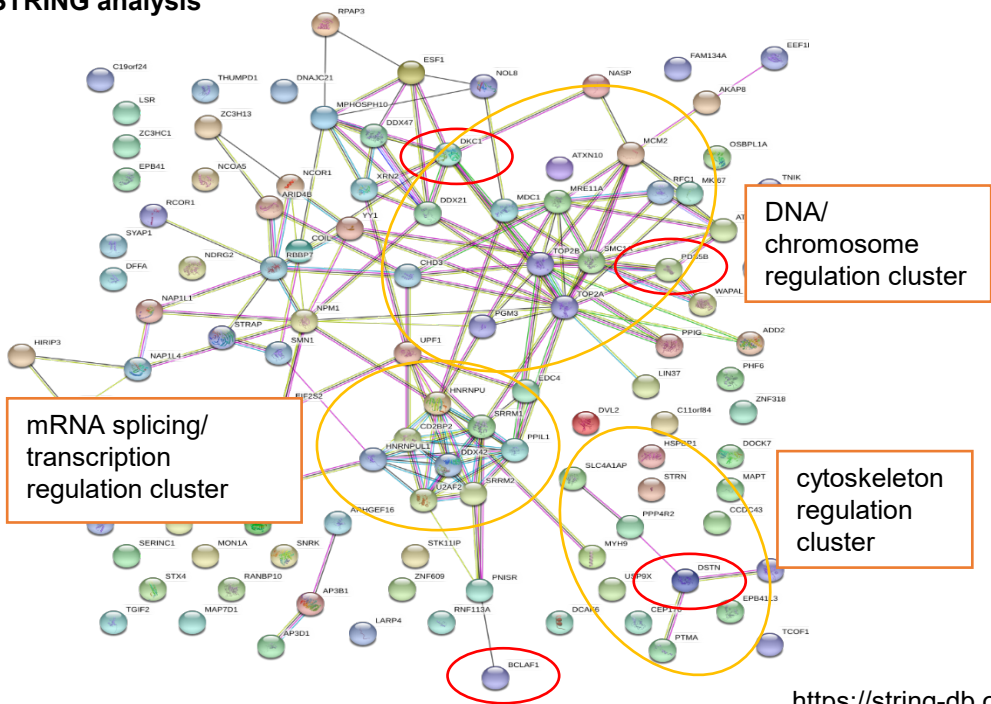

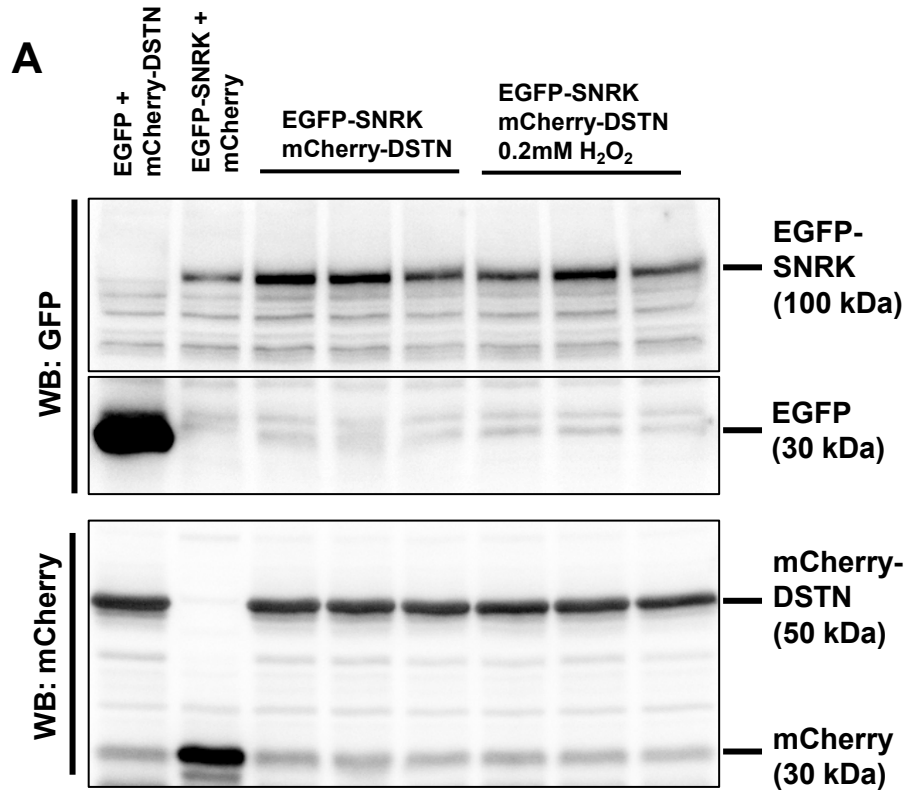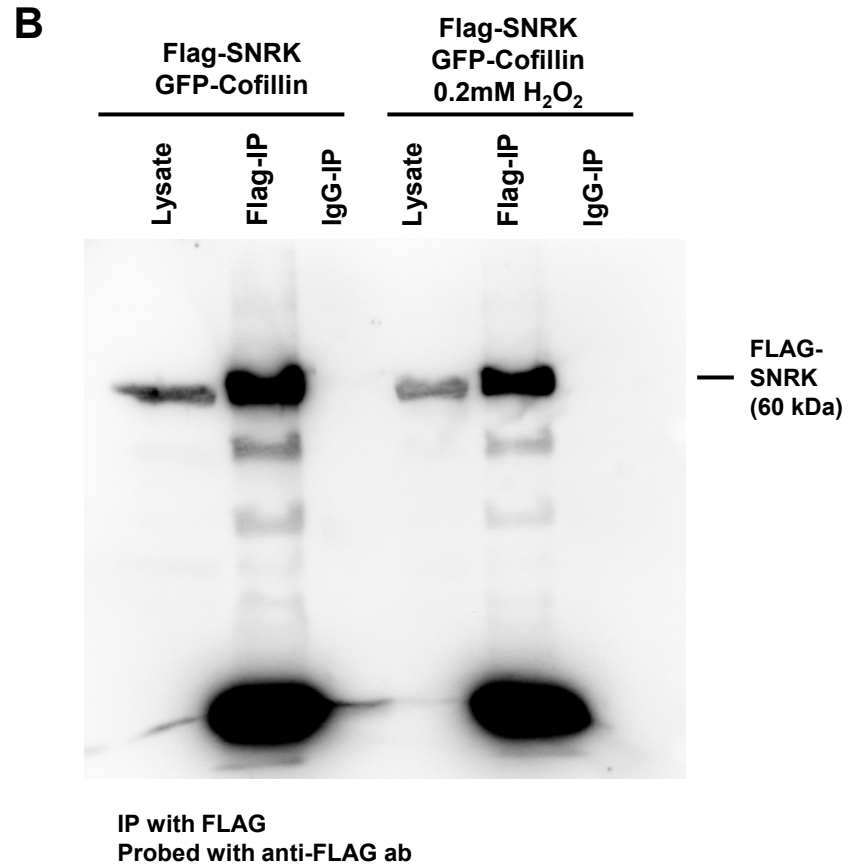

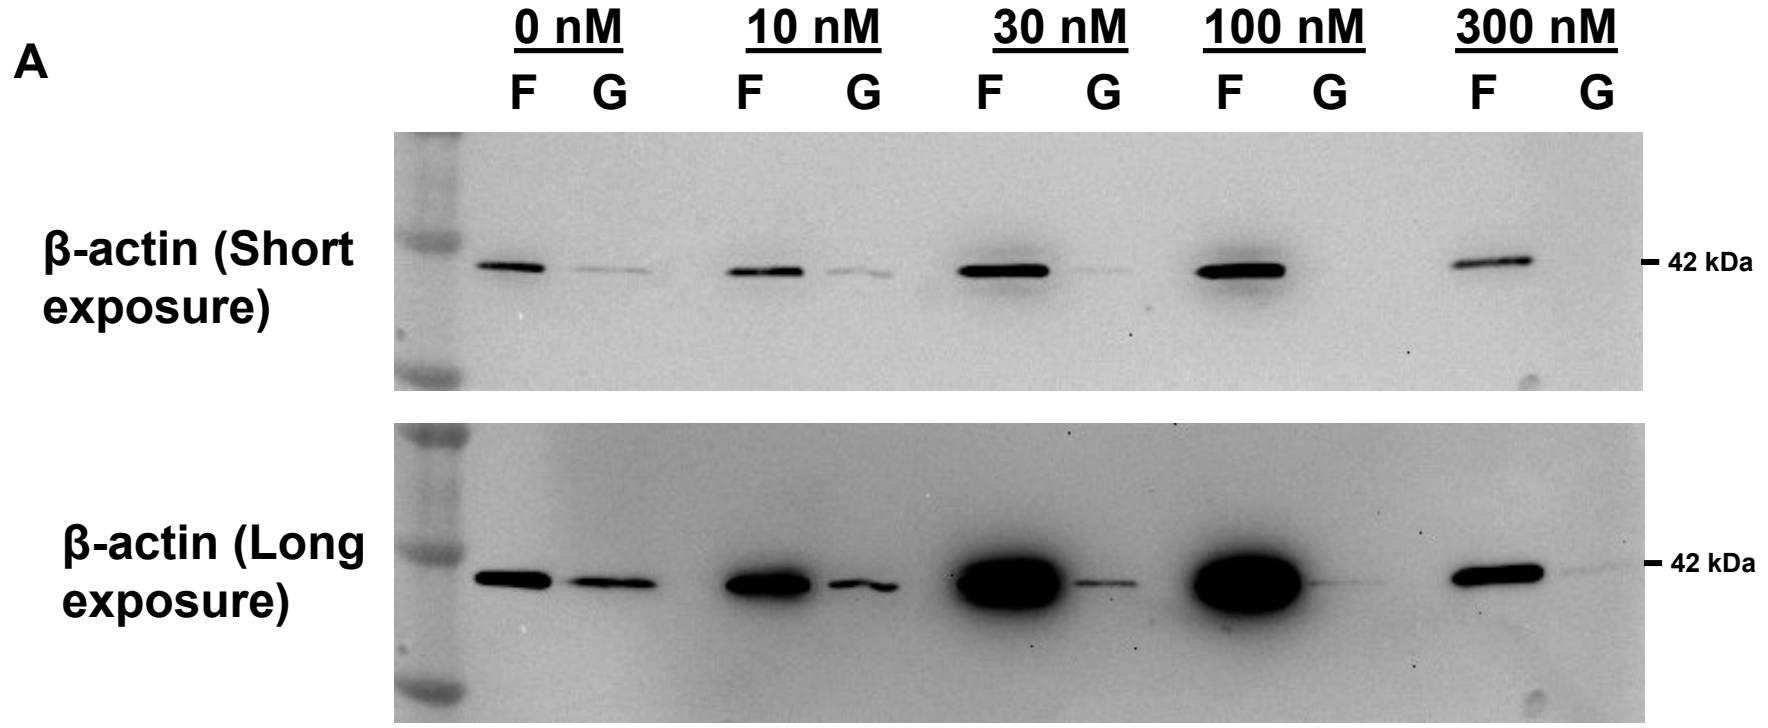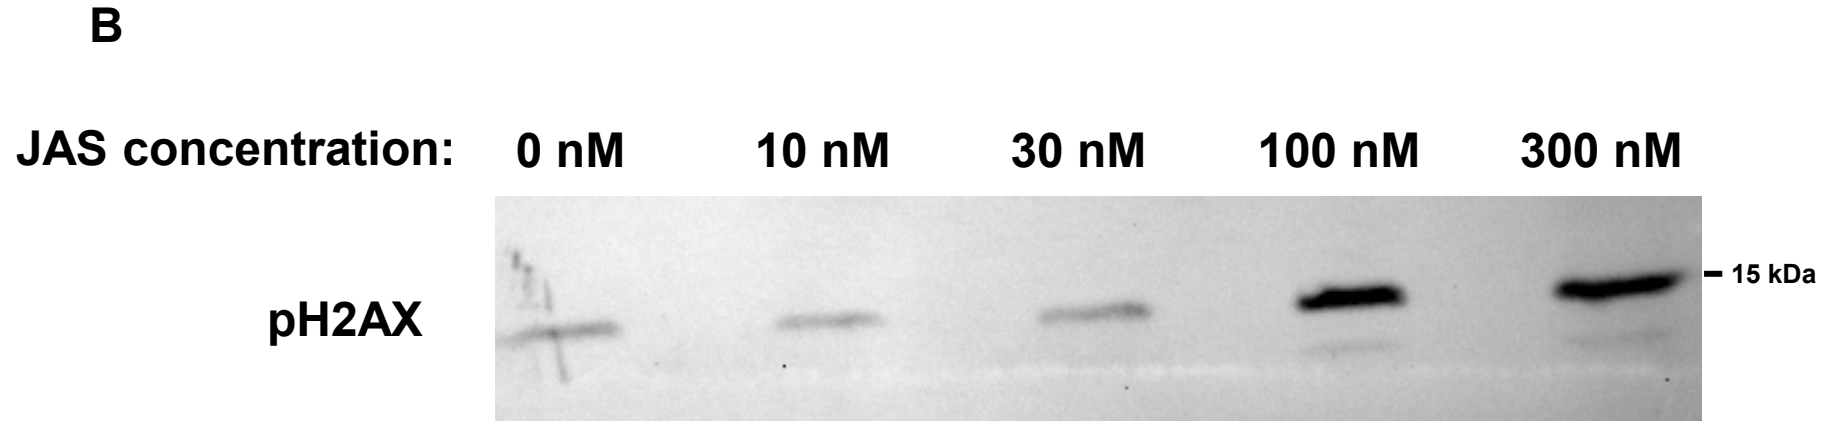

Supplement: NIHMS1929021-supplement-Supplemental_Figures.pdf [file NIHMS1929021-supplement-Supplemental_Figures.pdf]
